# Supplementary figures and images for: Ankyrin-B Interactions with Spectrin and Dynactin-4 Are Required for Dystrophin-based Protection of Skeletal Muscle from Exercise Injury
Source: PubMed Central journal article supplement — J Biol Chem. 2010 Dec 25;286(9):7370–8. doi: 10.1074/jbc.M110.187831 (PMC3044993; doi:10.1074/jbc.m110.187831), 2010-12-25

**A**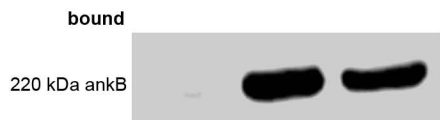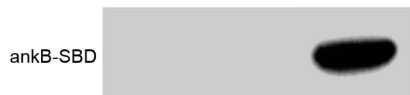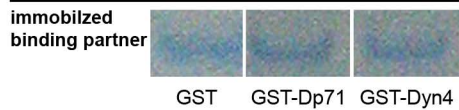**B**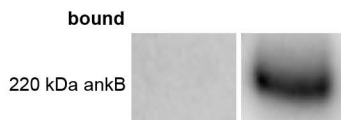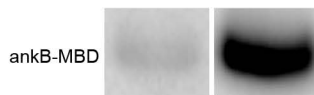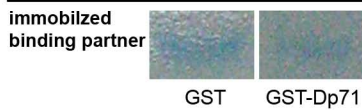

Supplement: supp_M110.187831_jbc.M110.187831-2.pdf [file supp_M110.187831_jbc.M110.187831-2.pdf]

cysteine rich  
domain

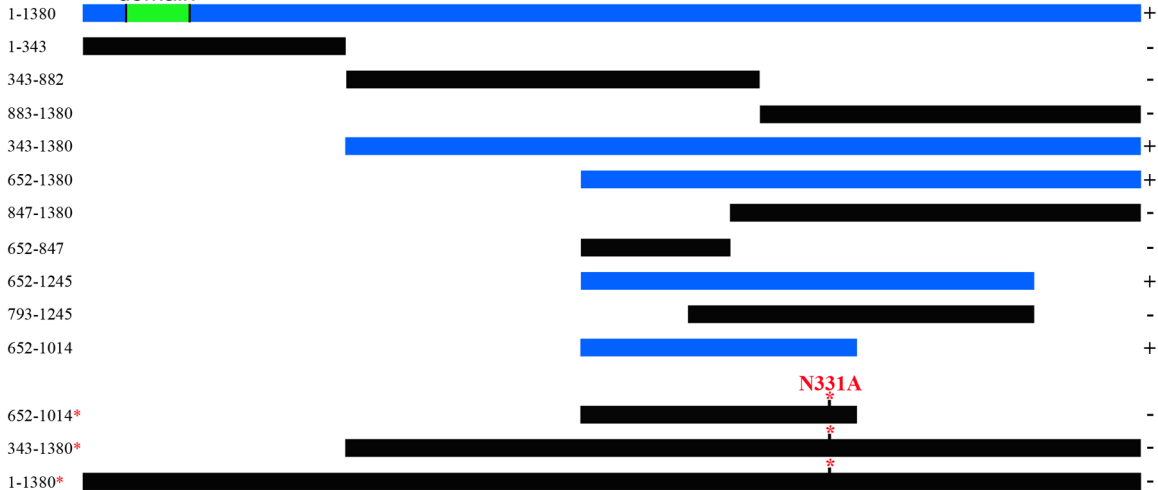

Supplement: supp_M110.187831_jbc.M110.187831-3.pdf [file supp_M110.187831_jbc.M110.187831-3.pdf]
